# Supplementary material for: Short Report: Evaluating the Effects of Automated Donor Referral Technology on Deceased Donor Referrals
Source: PubMed Central journal article supplement — Transplant Direct. 2022 Jul 25;8(8):e1330. doi: 10.1097/TXD.0000000000001330 (PMC10109458; doi:10.1097/txd.0000000000001330), 2022-07-25
Supplement: txd-8-e1330-s001.pdf [file txd-8-e1330-s001.pdf]

**Table S1. Demographics of manual and automated referrals at pilot hospitals after implementation of the automated referral system.**

|                         | Manual<br>N=212 | Automated<br>N=590 |
|-------------------------|-----------------|--------------------|
| Median (IQR) age        | 65 (53-76)      | 66 (53-76)         |
| Female                  | 30.6%           | 41.2%              |
| Non-Hispanic White      | 74.1%           | 69.8%              |
| Hispanic                | 7.5%            | 4.9%               |
| Black                   | 17.5%           | 23.6%              |
| Other/missing           | 0.9%            | 1.7%               |
| Registered organ donors | 21.7%           | 20.7%              |

**Table S2. Difference-in-differences analysis of the change in events per month associated with implementation of the automated referral system, with the post-10/2018 period ending in February 2020.**

| Event          | aIRR                  | P      |
|----------------|-----------------------|--------|
| Referrals      | 1.16 <b>1.32</b> 1.51 | <0.001 |
| Approaches     | 1.30 <b>1.83</b> 2.56 | <0.001 |
| Authorizations | 1.04 <b>1.63</b> 2.54 | 0.03   |
| Organ donors   | 0.84 <b>1.50</b> 2.69 | 0.17   |
